# Supplementary material for: The Double-Edged Sword in Pathogenic Trypanosomatids: The Pivotal Role of Mitochondria in Oxidative Stress and Bioenergetics
Source: Hindawi journal article supplement (doi:10.1155/2014/614014), 2014-01-01
Supplement: f1 [file 614014.f1.pdf]

| Gene ID                                       | Protein description                                                                                 |
|-----------------------------------------------|-----------------------------------------------------------------------------------------------------|
| LmjF25.2010                                   | 2,4-dihydroxyhept-2-ene-1,7-dioic acid aldolase, putative                                           |
| LinJ.35.0050<br>LdBPK_350050.1<br>LmjF35.0050 | 2-oxoisovalerate dehydrogenase beta subunit, mitochondrial precursor, putative                      |
| LdBPK_312320.1<br>LmjF31.2250                 | 3,2-trans-enoyl-CoA isomerase, mitochondrial precursor, putative                                    |
| LdBPK_290010.1                                | 3,2-trans-enoyl-CoA isomerase, mitochondrial precursor-like protein                                 |
| LmjF30.3190<br>LinJ.30.3230                   | 3-hydroxy-3-methylglutaryl-CoA reductase (HMGR)                                                     |
| LmjF23.0690                                   | 3-ketoacyl-CoA thiolase, putative                                                                   |
| LinJ.25.1850                                  | 3-oxo-5-alpha-steroid 4-dehydrogenase, putative                                                     |
| LmjF31.2970                                   | acetyl-CoA carboxylase, putative                                                                    |
| LinJ.04.1250                                  | actin (ACT)                                                                                         |
| LmjF27.0290                                   | acyl carrier protein, putative (ACP)                                                                |
| LmjF07.0460<br>LdBPK_070150.1                 | acyl-CoA dehydrogenase, mitochondrial precursor, putative                                           |
| LinJ.19.0200<br>LdBPK_190200.1<br>LmjF19.0210 | ADP,ATP carrier protein 1, mitochondrial precursor, putative,ADP/ATP translocase 1, putative (ANC2) |
| LmjF14.0990<br>LdBPK_141050.1                 | ADP/ATP mitochondrial carrier-like protein                                                          |

|                                                                                        |                                                           |
|----------------------------------------------------------------------------------------|-----------------------------------------------------------|
| LinJ.25.1160<br>LdBPK_251160.1<br>LmjF25.1120                                          | aldehyde dehydrogenase, mitochondrial precursor (ALDH2)   |
| LdBPK_364000.1                                                                         | aminomethyltransferase, mitochondrial precursor, putative |
| LmjF34.0070<br>LinJ.34.0070                                                            | ascorbate peroxidase (APX)                                |
| <del>LinJ.36.2130</del><br>LdBPK_362130.1<br>LdBPK_362140.1<br><del>LinJ.22.1040</del> | chaperonin HSP60, mitochondrial precursor                 |
| LmjF18.0680<br>LdBPK_180700.1                                                          | citrate synthase, putative                                |
| LinJ.30.0760<br>LmjF30.0730                                                            | co-chaperone GrpE, putative                               |
| LmjF09.1490<br>LdBPK_110490.1                                                          | cytochrome b5-like protein, putative                      |
| LmjF04.1130<br>LmjF20.0840<br>LdBPK_030090.1                                           | cytochrome c oxidase assembly factor, putative            |
| LinJ.03.0720<br>LdBPK_030720.1                                                         | cytochrome c oxidase copper chaperone, putative           |
| LinJ.23.0420                                                                           | cytochrome c oxidase subunit 10, putative                 |
| LdBPK_367350.1                                                                         | cytochrome c oxidase subunit I                            |
| LmjF12.0670<br>LinJ.12.0620                                                            | cytochrome c oxidase subunit IV                           |
| LmjF26.1710<br>LinJ.26.1690                                                            | cytochrome c oxidase subunit V, putative                  |
| LdBPK_212080.1                                                                         | cytochrome c oxidase subunit VI, putative                 |

|                                               |                                                                   |
|-----------------------------------------------|-------------------------------------------------------------------|
| LinJ.25.1170                                  | cytochrome c oxidase VII, putative                                |
| LmjF31.1570<br>LinJ.31.1600                   | cytochrome c oxidase VIII (COX VIII), putative                    |
| LmjF16.1310<br>LdBPK_161390.1                 | cytochrome c, putative                                            |
| LinJ.07.0210<br>LdBPK_070210.1<br>LmjF07.0060 | cytochrome c1, heme protein, mitochondrial precursor, putative    |
| LdBPK_150050.1                                | cytochrome-b5 reductase, putative                                 |
| LmjF03.0200                                   | delta-1-pyrroline-5-carboxylate dehydrogenase, putative           |
| LinJ.16.1340                                  | diacylglycerol kinase, putative                                   |
| LinJ.32.3510<br>LmjF32.3310                   | dihydrolipoamide dehydrogenase, putative (GCVL-2)                 |
| LinJ.15.1270                                  | E2-like ubiquitin-conjugation enzyme (UFC1)                       |
| LmjF25.1770                                   | enoyl-CoA reductase, putative (EnCR)                              |
| LinJ.28.0240<br>LdBPK_280240.1<br>LmjF28.0240 | glycerol-3-phosphate dehydrogenase (FAD-dependent), mitochondrial |
| LmjF36.3800                                   | glycine synthase, putative (GCVT1)                                |
| LinJ.36.4000                                  | glycine synthase, putative (GCVT-2)                               |
| LmjF33.2730                                   | guide RNA associated protein, GAP1, putative                      |

|                                             |                                                                                    |
|---------------------------------------------|------------------------------------------------------------------------------------|
| LinJ.22.0520<br>LmjF22.0650                 | guide RNA associated protein, GAP2, putative                                       |
| LmjF30.2480<br>LdBPK_302480.1               | heat shock 70-related protein 1, mitochondrial precursor, putative                 |
| LinJ.15.0090<br>LmjF.15.0090<br>LmjF15.0090 | heat shock protein HslVU, ATPase subunit HslU, putative                            |
| LmjF36.3990<br>LinJ.36.4180                 | hs1vu complex proteolytic subunit-like, threonine peptidase, Clan T(1), family T1B |
| LinJ.04.0260                                | hypothetical protein, conserved                                                    |
| LinJ.08.0340                                | hypothetical protein, conserved                                                    |
| LinJ.09.1070                                | hypothetical protein, conserved                                                    |
| LinJ.22.1330                                | hypothetical protein, conserved                                                    |
| LinJ.23.0870                                | hypothetical protein, conserved                                                    |
| LmjF.35.0100                                | hypothetical protein, conserved                                                    |
| LmjF04.0270                                 | hypothetical protein, conserved                                                    |
| LmjF09.1010                                 | hypothetical protein, conserved                                                    |
| LmjF36.0620                                 | hypothetical protein, conserved                                                    |
| LmjF36.3890                                 | hypothetical protein, conserved                                                    |

|                                                                  |                                                                                                                               |
|------------------------------------------------------------------|-------------------------------------------------------------------------------------------------------------------------------|
| LinJ.35.3670<br>LmjF35.3620                                      | iron-sulfur cluster assembly protein, putative                                                                                |
| LinJ.10.0310<br>LdBPK_100310.1<br>LmjF10.0290                    | isocitrate dehydrogenase [NADP], mitochondrial precursor, putative                                                            |
| LinJ.33.2680                                                     | isocitrate dehydrogenase, putative                                                                                            |
| LmjF18.0010                                                      | kinetoplast polyadenylation/uridylation factor 1                                                                              |
| LmjF32.1140                                                      | kinetoplast polyadenylation/uridylation factor 2, putative                                                                    |
| LinJ.36.2440<br>LmjF27.0630<br>LmjF33.2510<br>LmjF36.2210        | kinetoplast poly(A) polymerase complex 1 subunit, putative, mitochondrial<br>edited mRNA stability factor 1 subunit, putative |
| LinJ.01.0610                                                     | KREL1                                                                                                                         |
| LinJ.29.1000<br>LmjF29.0920                                      | LETM1 and EF-hand domain-containing protein 1, putative                                                                       |
| LinJ.35.4790<br>LmjF35.4720                                      | lipoic acid containing carrier protein, putative (GCVH)                                                                       |
| LdBPK_190350.1                                                   | lipoic acid synthetase, mitochondrial precursor, putative                                                                     |
| LinJ.08.0330<br>LdBPK_080330.1<br>LmjF08.0320                    | mitochondrial associated ribonuclease, putative                                                                               |
| LmjF36.2710<br>LdBPK_341130.1<br>LdBPK_362850.1                  | mitochondrial ATP-dependent zinc metallopeptidase, putative                                                                   |
| LinJ.36.2850<br>LinJ.34.1130                                     | mitochondrial ATP-dependent zinc metallopeptidase, putative, metallo-<br>peptidase, Clan MA(E), Family M41                    |
| LinJ.02.0640<br>LinJ.19.1090<br>LdBPK_020640.1<br>LdBPK_191090.1 | mitochondrial carrier protein, putative                                                                                       |

|                                                                  |                                                                                                                                |
|------------------------------------------------------------------|--------------------------------------------------------------------------------------------------------------------------------|
| LinJ.29.2890<br>LinJ.30.1110<br>LdBPK_292890.1<br>LdBPK_301110.1 | mitochondrial carrier protein-like protein                                                                                     |
| LinJ.28.2220<br>LdBPK_282220.1<br>LmjF28.2080                    | mitochondrial DEAD box protein, putative                                                                                       |
| LinJ.08.0830<br>LdBPK_080830.1<br>LmjF08.0890                    | mitochondrial DNA polymerase beta                                                                                              |
| LmjF08.0900<br>LdBPK_080840.1                                    | mitochondrial DNA polymerase beta-PAK, putative                                                                                |
| LdBPK_130080.1                                                   | mitochondrial DNA polymerase I protein B, putative                                                                             |
| LmjF14.0920<br>LdBPK_140980.1                                    | mitochondrial DNA polymerase I protein C, putative                                                                             |
| LdBPK_131370.1                                                   | mitochondrial DNA polymerase I protein D, putative                                                                             |
| LmjF23.0680                                                      | mitochondrial DNA primase, putative (PRI1)                                                                                     |
| LdBPK_151310.1                                                   | mitochondrial DNA topoisomerase II                                                                                             |
| LdBPK_241180.1                                                   | mitochondrial DNA-directed RNA polymerase, putative                                                                            |
| LinJ.36.0620<br>LdBPK_360620.1<br>LmjF36.0570                    | Mitochondrial elongation factor G, putative (MEFG)                                                                             |
| LmjF04.0330<br>LdBPK_040320.1                                    | mitochondrial exoribonuclease DSS-1, putative                                                                                  |
| LinJ.09.1190<br>LdBPK_091190.1                                   | mitochondrial import inner membrane translocase subunit TIM17, putative, inner membrane preprotein translocase Tim17, putative |
| LmjF36.4450<br>LdBPK_364670.1                                    | mitochondrial intermediate peptidase, putative                                                                                 |

|                                                                                 |                                                                                                                     |
|---------------------------------------------------------------------------------|---------------------------------------------------------------------------------------------------------------------|
| LmjF34.0160<br>LdBPK_340170.1                                                   | mitochondrial malate dehydrogenase (mMDH)                                                                           |
| LmjF30.0780<br>LdBPK_300830.1                                                   | mitochondrial oligo_U binding protein TBRGG1, putative                                                              |
| LmjF35.4430<br>LdBPK_354490.1                                                   | mitochondrial phosphate transporter, putative                                                                       |
| <del>LmjF13.0870</del><br>LmjF21.0340<br>LmjF33.2610<br><del>LinJ.33.0760</del> | mitochondrial processing peptidase alpha subunit, putative                                                          |
| LdBPK_351390.1<br>LdBPK_010670.1<br><del>LmjF25.1280</del>                      | mitochondrial processing peptidase, beta subunit, putative, metallo-peptidase, Clan ME, Family M16                  |
| LinJ.14.1560                                                                    | mitochondrial pyruvate carrier protein 2, putative                                                                  |
| <del>LmjF25.1540</del><br>LmjF25.1740<br>LmjF26.1140<br><del>LmjF21.0620</del>  | mitochondrial RNA binding complex 1 subunit, putative                                                               |
| LinJ.27.0980<br>LdBPK_270980.1                                                  | mitochondrial RNA binding protein 1,gBP21, MRP1                                                                     |
| LmjF24.0830                                                                     | mitochondrial RNA binding protein 1,mitochondrial edited mRNA stability factor 1,Mitochondrial poly(A) polymerase 1 |
| LmjF09.1120                                                                     | mitochondrial RNA binding protein 2                                                                                 |
| LinJ.09.1180<br>LdBPK_091180.1                                                  | mitochondrial RNA binding protein 2,MRP2, gBP25                                                                     |
| LinJ.33.1320<br>LdBPK_230930.1<br>LmjF33.1250                                   | mitochondrial RNA binding protein, putative                                                                         |
| LdBPK_010610.1                                                                  | mitochondrial RNA editing ligase 1                                                                                  |
| LinJ.21.2020<br>LdBPK_212020.1<br>LmjF21.1660                                   | mitochondrial structure specific endonuclease I (SSE-1), putative                                                   |

|                                                                   |                                                                                 |
|-------------------------------------------------------------------|---------------------------------------------------------------------------------|
| LdBPK_240730.1                                                    | mitochondrial translocase subunit, putative                                     |
| LmjF05.0310                                                       | monothiol glutaredoxin, putative                                                |
| LmjF36.0700                                                       | MP18 RNA editing complex protein, putative                                      |
| LinJ.08.1080<br>LmjF08.1170                                       | MRB1-associated protein, putative,guide RNA binding protein, putative           |
| LinJ.32.3370<br>LmjF.32.3170                                      | NADH dehydrogenase subunit NI8M, putative                                       |
| LinJ.36.3680                                                      | NADH-ubiquinone oxidoreductase complex I subunit, putative                      |
| Lmj.05.0980<br>LdBPK_050980.1<br>LdBPK_170320.1<br>LdBPK_120720.1 | NADH-ubiquinone oxidoreductase, mitochondrial, putative                         |
| LinJ.32.2590<br>LmjF32.2440                                       | NUDIX hydrolase, putative,mitochondrial RNA binding complex 1 subunit, putative |
| LinJ.30.1030<br>LmjF30.0970                                       | p22 protein precursor, putative                                                 |
| LmjF28.0980                                                       | P27 protein, putative (P27)                                                     |
| LmjF04.0820                                                       | peptide deformylase, putative (EMBL:AY353252) (metalloprotease-like protein)    |
| LmjF34.4530                                                       | phosphatidylinositol 3-kinase (tor2), putative (TOR2)                           |
| LmjF19.1620                                                       | potassium voltage-gated channel, putative                                       |
| LmjF26.1610<br>LdBPK_261590.1                                     | proline oxidase, mitochondrial precursor-like protein                           |



|                                               |                                                                                   |
|-----------------------------------------------|-----------------------------------------------------------------------------------|
| LmjF34.1250                                   | PTP1-interacting protein, 39 kDa, putative                                        |
| LmjF26.0030                                   | pyridoxal phosphate containing glycine decarboxylase, putative (GCVP)             |
| LmjF15.0280<br>LdBPK_150330.1<br>LinJ.15.0320 | ribonucleoprotein p18, mitochondrial precursor, putative                          |
| LmjF34.3230                                   | RNA editing associated helicase 2, putative (REH2)                                |
| LmjF28.2370                                   | serine hydroxymethyltransferase (SHMT-L) (SHMT-L)                                 |
| LmjF11.0100                                   | seryl-tRNA synthetase, putative                                                   |
| LinJ.36.3100<br>LmjF36.2950                   | succinyl-CoA ligase [GDP-forming] beta-chain, putative                            |
| LinJ.33.2470<br>LdBPK_332470.1<br>LmjF33.2340 | succinyl-coA:3-ketoacid-coenzyme A transferase, mitochondrial precursor, putative |
| LinJ.29.1940<br>LmjF29.1820                   | Tob55, putative                                                                   |
| LinJ.24.1570<br>LmjF24.1500                   | translationally controlled tumor protein (TCTP), putative                         |
| LmjF26.1550<br>LdBPK_261530.1                 | trifunctional enzyme alpha subunit, mitochondrial precursor-like protein          |
| LmjF29.1150                                   | tryparedoxin (TXN2)                                                               |
| LinJ.31.2650                                  | ubiquinol-cytochrome-c reductase-like protein                                     |
| LmjF16.1065                                   | ubiquitin fold modifier protein, putative (UFM1)                                  |

|                             |                                                     |
|-----------------------------|-----------------------------------------------------|
| LinJ.02.0430<br>LmjF02.0460 | voltage-dependent anion-selective channel, putative |
|-----------------------------|-----------------------------------------------------|

| Paape et al. 2010 | Nirujogi et al. 2013 |
|-------------------|----------------------|
| yes               | no                   |
| yes               | yes                  |
| yes               | yes                  |
| no                | yes                  |
| yes               | yes                  |
| yes               | no                   |
| no                | yes                  |
| yes               | no                   |
| no                | yes                  |
| yes               | no                   |
| yes               | yes                  |
| yes               | yes                  |
| yes               | yes                  |

|     |     |
|-----|-----|
| yes | yes |
| no  | yes |
| yes | yes |
| yes | yes |
| yes | yes |
| yes | yes |
| yes | yes |
| yes | yes |
| no  | yes |
| no  | yes |
| no  | yes |
| yes | yes |
| yes | yes |
| no  | yes |

|     |     |
|-----|-----|
| no  | yes |
| yes | yes |
| yes | yes |
| yes | yes |
| no  | yes |
| yes | no  |
| no  | yes |
| yes | yes |
| no  | yes |
| yes | no  |
| yes | yes |
| yes | no  |
| no  | yes |
| yes | no  |

|     |     |
|-----|-----|
| yes | yes |
| yes | yes |
| yes | yes |
| yes | yes |
| no  | yes |
| no  | yes |
| no  | yes |
| no  | yes |
| no  | yes |
| no  | yes |
| yes | no  |
| yes | no  |
| yes | no  |
| yes | no  |

|     |     |
|-----|-----|
| yes | yes |
| yes | yes |
| no  | yes |
| yes | no  |
| yes | no  |
| yes | yes |
| no  | yes |
| yes | yes |
| yes | yes |
| no  | yes |
| yes | yes |
| yes | yes |
| no  | yes |
| yes | yes |

|     |     |
|-----|-----|
| no  | yes |
| yes | yes |
| yes | yes |
| yes | yes |
| no  | yes |
| yes | yes |
| no  | yes |
| yes | no  |
| no  | yes |
| no  | yes |
| yes | yes |
| yes | yes |
| no  | yes |
| yes | yes |

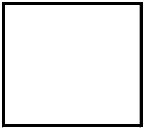



|     |     |
|-----|-----|
| yes | yes |
| yes | yes |
| yes | yes |
| yes | yes |
| yes | yes |
| no  | yes |
| yes | yes |
| no  | yes |
| yes | no  |
| yes | no  |
| no  | yes |
| yes | yes |
| no  | yes |
| yes | yes |

|     |     |
|-----|-----|
| no  | yes |
| yes | no  |
| yes | no  |
| yes | yes |
| no  | yes |
| no  | yes |
| no  | yes |
| yes | yes |
| yes | yes |
|     |     |
| yes | no  |
| yes | no  |
| yes | no  |
| yes | yes |

|     |     |
|-----|-----|
| yes | no  |
| yes | no  |
| yes | yes |
| yes | no  |
| yes | no  |
| yes | no  |
| yes | yes |
| yes | yes |
| yes | yes |
| yes | yes |
| yes | yes |
| yes | no  |
| no  | yes |
| yes | no  |

|     |     |
|-----|-----|
| yes | yes |
|-----|-----|
